# Supplementary material for: Synthesis of amine-polyglycidol functionalised Fe3O4@SiO2nanocomposites for magnetic hyperthermia, pH-responsive drug delivery, and bioimaging applications
Source: Royal Society of Chemistry journal article supplement (doi:10.1039/c6ra23470d), 2016-01-01
Supplement: c6ra23470d1.pdf [file c6ra23470d1.pdf]

## Electronic Supporting Information

# Synthesis of amine-polyglycidol functionalised Fe<sub>3</sub>O<sub>4</sub>@SiO<sub>2</sub> nanocomposites for magnetic hyperthermia, pH-responsive drug delivery, and bioimaging applications

**Madhappan Santha Moorthy<sup>a</sup>, Yunok Oh<sup>a</sup>, Subramanian Bharathiraja<sup>a</sup>, Panchanathan Manivasagan<sup>a</sup>, Thenmozhi Rajarathinam<sup>b</sup>, Bian Jang<sup>b</sup>, Thi Tuong Vy Phan<sup>b</sup>, Hyukjin Jang<sup>c</sup> and Junghwan Oh<sup>a,b,\*</sup>**

<sup>a</sup>Marine-Integrated Bionics Research Center, Pukyong National University, Busan 608-737, Republic of Korea

<sup>b</sup>Department of Biomedical Engineering and Center for Marine-Integrated Biotechnology (BK21 Plus), Pukyong National University, Busan 608-737, Republic of Korea

<sup>c</sup>206 South Martin Jischke Drive, West Lafayette, Indiana 47907, United States

\*Email: jungoh@pknu.ac.kr

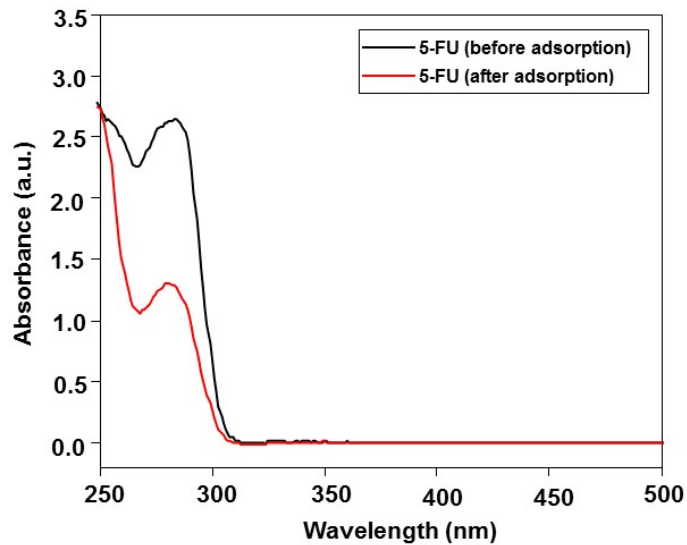

**Fig. S1** UV-vis absorption profiles of 5-FU loading into  $\text{Fe}_3\text{O}_4@\text{SiO}_2@\text{APG-F}$  nanocomposites.

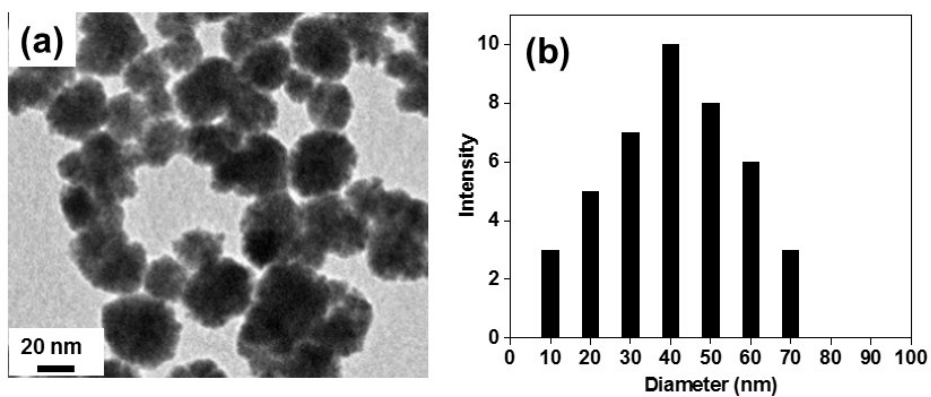

**Fig. S2** TEM image (a) and its corresponding particle size distribution (b) of the bare  $\text{Fe}_3\text{O}_4$  nanoparticles.

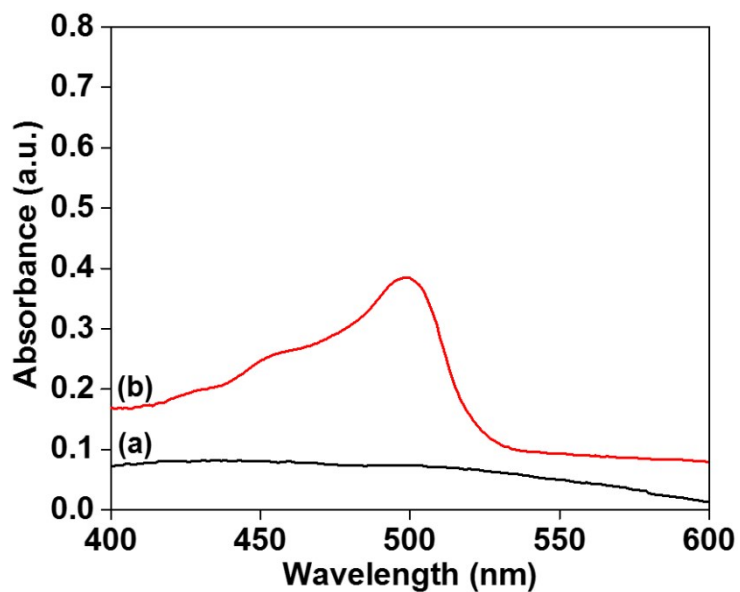

**Fig. S3.** UV-vis spectra of (a) pristine Fe<sub>3</sub>O<sub>4</sub> NP and (b) FITC conjugated Fe<sub>3</sub>O<sub>4</sub>@SiO<sub>2</sub>@APG-F nanocomposites.

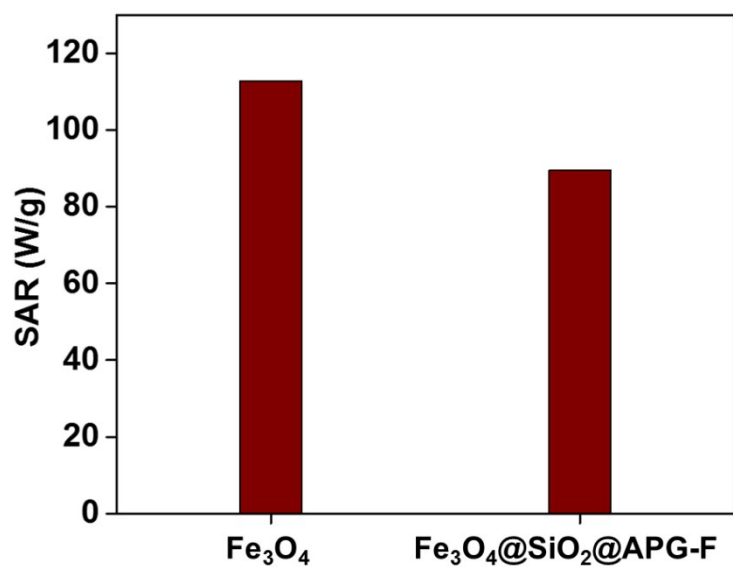

**Fig. S4** The SAR values of pristine Fe<sub>3</sub>O<sub>4</sub> nanoparticles and FITC conjugated Fe<sub>3</sub>O<sub>4</sub>@SiO<sub>2</sub>@APG-F nanocomposites under magnetic field frequency  $f = 409$  kHz and applied magnetic field  $H = 180$  Gauss.
